# Supplementary material for: Early Onset Intrahepatic Cholangiocarcinoma: Clinical Characteristics, Oncological Outcomes, and Genomic/Transcriptomic Features
Source: PubMed Central journal article supplement (PMC10997729; doi:10.1245/s10434-024-15013-5), 2024-02-12

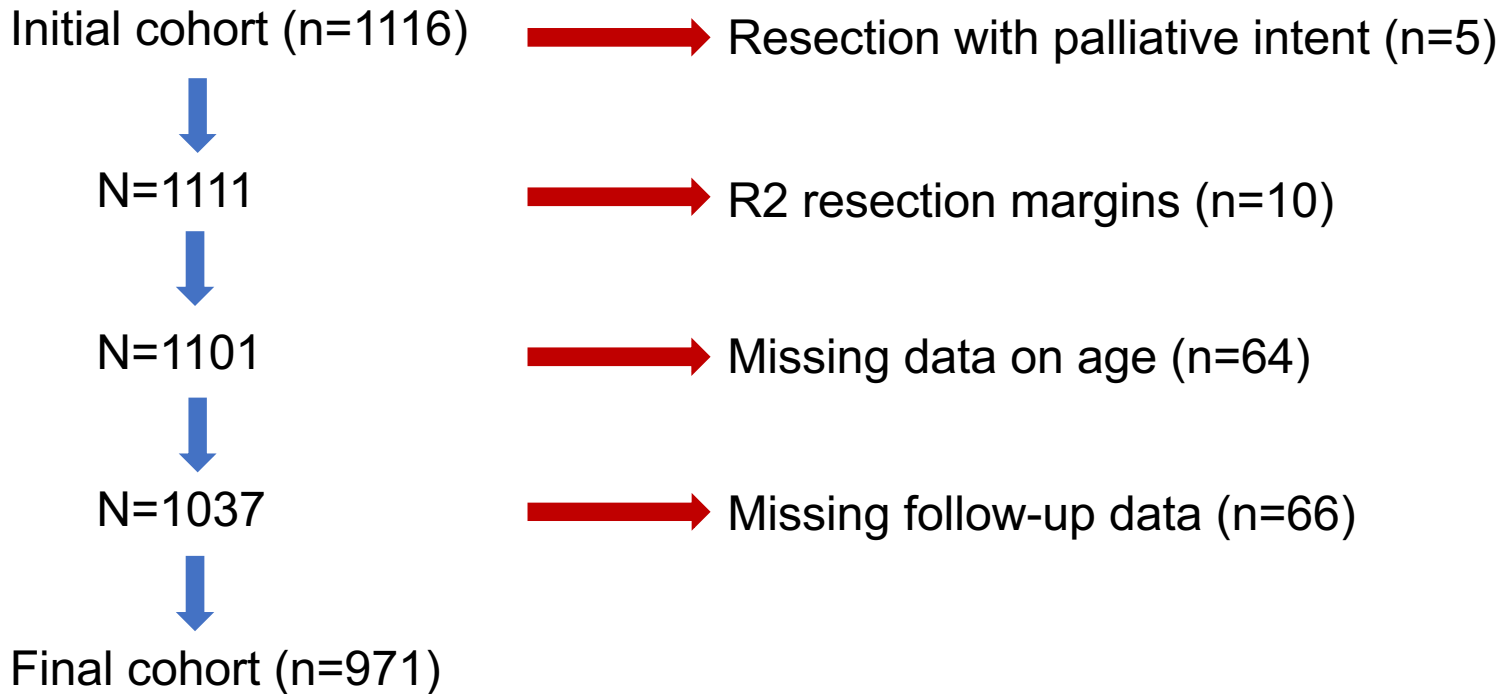

Supplement: 10434_2024_15013_MOESM1_ESM.pdf [file 10434_2024_15013_MOESM1_ESM.pdf]
